# Supplementary material for: Determination of Reference Values for Tear Production and Intraocular Pressure in Pygoscelid Penguins of the Antarctic Peninsula † ‡
Source: Research Square preprint supplement (doi:10.21203/rs.3.rs-1523458/v1), 2022-04-20
Supplement: Supplementary file 1 [file 66a5a42e714ef24f91d5e08f.docx]

Third National Antarctic Science Expedition (TAE III) organized by Istanbul Technical University, Polar Research Center (PolReC) and organized to Antarctica (Ardley Island, King George Island) in 2018-2019

I participated with the bilateral cooperation project (Instituto Antártico Chileno, INACH, Antarctic Scientific Expedition, ECA 55) titled "The cytological, microbiological and ophthalmic evaluation of samples of ocular surface from the Antarctic Peninsula penguins"

I left the port of Punta Arenas with 44 researchers on a military ship named Aquiles with the Chilean flag and went to the South Shetland Islands and the northern part of the Antarctic Peninsula.

Within the scope of our project, we collected brush and pressure samples from the ocular surfaces of 3 types of penguins (Gentoo, Adelie and Chinstrap) belonging to the Pygoscelid genus in the Antarctic peninsula, and performed both pathological and microbiological evaluations with swap samples.

In addition, eye pressure was measured by tonometer for ophthalmic examinations of each penguin, and Schimer tear test results were recorded. The microbiological and cytological part of the project has been prepared as a separate manuscript.

The current article covers the ophthalmological part of the project. Supplementary video shows both cytological microbiological samples. In order to avoid confusion, the time when Schirmer test and tonometer were used are stated in the article.
